# Supplementary material
Source: publisher site journal article supplement (https://www.dovepress.com/article/402259)
Supplement: Supplementary file 1 [file get_supplementary_file.php]

| Supplementary Table 1. List of Japanese medical school | | |
| --- | --- | --- |
| ID | List of university | University type |
| 1 | School of Medicine, Hokkaido University | National University |
| 2 | Asahikawa Medical University | National University |
| 3 | School of Medicine, Hirosaki University | National University |
| 4 | School of Medicine, Tohoku University | National University |
| 5 | Faculty of Medicine, Akita University | National University |
| 6 | Faculty of Medicine, Yamagata University | National University |
| 7 | School of Medicine and Medical Sciences, University of Tsukuba | National University |
| 8 | Faculty of Medicine, Gunma University | National University |
| 9 | School of Medicine, Chiba University | National University |
| 10 | Faculty of Medicine, The University of Tokyo | National University |
| 11 | Faculty of Medicine, Tokyo Medical and Dental University | National University |
| 12 | School of Medicine, Niigata University | National University |
| 13 | University of Toyama Faculty of Medicine | National University |
| 14 | School of Medicine, College of Medical, Pharmaceutical and Health Sciences, Kanazawa University | National University |
| 15 | School of Medical Sciences, University of Fukui | National University |
| 16 | University of Yamanashi Faculty of Medicine | National University |
| 17 | School of Medicine, Shinshu University | National University |
| 18 | School of Medicine, Gifu University | National University |
| 19 | Hamamatsu University School of Medicine | National University |
| 20 | School of Medicine, Nagoya University | National University |
| 21 | Faculty of Medicine, Mie University | National University |
| 22 | Shiga University of Medical Science | National University |
| 23 | Faculty of Medicine, Kyoto University | National University |
| 24 | Faculty of Medicine, Osaka University | National University |
| 25 | School of Medicine, Kobe University | National University |
| 26 | Faculty of Medicine, Tottori University | National University |
| 27 | Faculty of Medicine, Shimane University | National University |
| 28 | Medical School, Okayama University | National University |
| 29 | School of Medicine, Hiroshima University | National University |
| 30 | Faculty of Medicine and Health Sciences, Yamaguchi University | National University |
| 31 | Faculty of Medicine, Tokushima University | National University |
| 32 | Faculty of Medicine, Kagawa University | National University |
| 33 | School of Medicine, Ehime University | National University |
| 34 | Kochi Medical School, Kochi University | National University |
| 35 | School of Medicine, Kyushu University | National University |
| 36 | Faculty of Medicine, Saga University | National University |
| 37 | School of Medicine, Nagasaki University | National University |
| 38 | School of Medicine, Kumamoto University | National University |
| 39 | Faculty of Medicine, Oita University | National University |
| 40 | Faculty of Medicine, University of Miyazaki | National University |
| 41 | Faculty of Medicine, Kagoshima University | National University |
| 42 | Faculty of Medicine, University of the Ryukyus | National University |
| 43 | School of Medicine, Sapporo Medical University | Public University |
| 44 | Fukushima Medical University | Public University |
| 45 | School of Medicine, Yokohama City University | Public University |
| 46 | Medical School, Nagoya City University | Public University |
| 47 | Kyoto Prefectural University of Medicine | Public University |
| 48 | Faculty of Medicine, Osaka City University | Public University |
| 49 | Nara Medical University | Public University |
| 50 | Wakayama Medical University | Public University |
| 51 | School of Medicine, Iwate Medical University | Private University |
| 52 | Faculty of Medicine, Tohoku Medical and Pharmaceutical University | Private University |
| 53 | Jichi Medical University | Private University |
| 54 | Dokkyo Medical University | Private University |
| 55 | Saitama Medical University | Private University |
| 56 | School of Medicine, International University of Health and Welfare | Private University |
| 57 | Faculty of Medicine, Kyorin University | Private University |
| 58 | School of Medicine, Keio University | Private University |
| 59 | Faculty of Medicine, Juntendo University | Private University |
| 60 | School of Medicine, Showa University | Private University |
| 61 | School of Medicine, Teikyo University | Private University |
| 62 | Tokyo Medical University | Private University |
| 63 | School of Medicine, The Jikei University | Private University |
| 64 | Tokyo Women's Medical University | Private University |
| 65 | Faculty of Medicine, Toho University | Private University |
| 66 | School of Medicine, Nihon University | Private University |
| 67 | Nippon Medical School | Private University |
| 68 | School of Medicine, Kitasato University | Private University |
| 69 | St. Marianna University School of Medicine | Private University |
| 70 | School of Medicine, Tokai University | Private University |
| 71 | School of Medicine, Kanazawa Medical University | Private University |
| 72 | School of Medicine, Aichi Medical University | Private University |
| 73 | School of Medicine, Fujita Health University | Private University |
| 74 | Osaka Medical College | Private University |
| 75 | Kansai Medical University | Private University |
| 76 | Faculty of Medicine, Kindai University | Private University |
| 77 | Hyogo College of Medicine | Private University |
| 78 | Kawasaki Medical School | Private University |
| 79 | School of Medicine, Kurume University | Private University |
| 80 | University of Occupational and Environmental Health, Japan | Private University |
| 81 | Faculty of Medicine, Fukuoka University | Private University |
| 82 | National Defense Medical College | Ministry of Defense |
